# Supplementary material
Source: PubMed Central journal article supplement (PMC3710797)
Supplement: 1301664110_pnas.201301664SI.pdf [file 1301664110_pnas.201301664SI.pdf]

# Supporting Information

Lo et al. 10.1073/pnas.1301664110

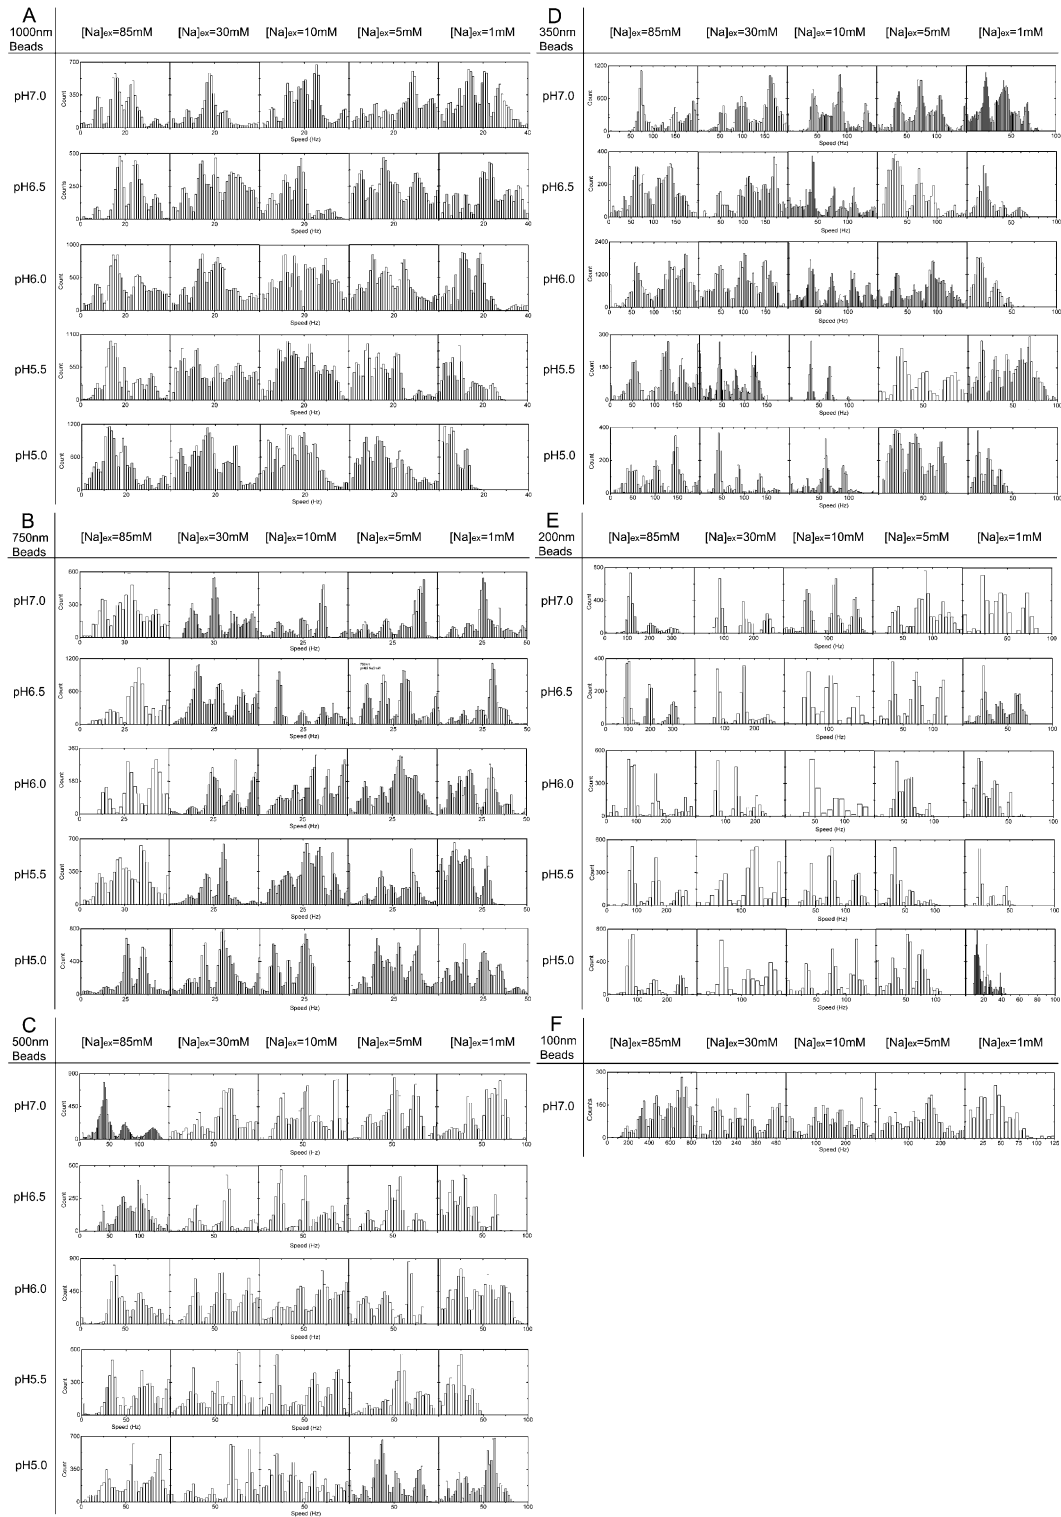

**Fig. S1.** Histogram of all speed measurements in different energetic conditions. (A) 1,000-nm beads; (B) 750-nm beads; (C) 500-nm beads; (D) 350-nm beads; (E) 200-nm beads; (F) 100-nm beads.



of  $k_{1,3,4}$  are fast and  $k_2$  is always rate limiting (*Inset, Lower Right*). (B) Simulated torque–speed curves from the four-state model, illustrating the rate-limiting step for each type. The parameter set with the lowest cost function is shown for each type of solution. The colors of the torque–speed curves indicate the transition with the slowest forward rate at that point (red, black, and green for steps 1, 2, and 3, respectively).

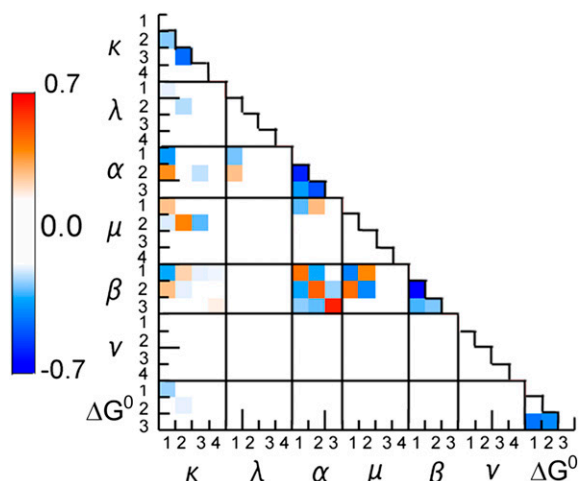

**Fig. S3.** Cross correlations between all pairs of parameters in the 830 parameter sets. Red shows positive correlations and blue negative correlations. Negative correlations between  $k_i$  support the identification above of alternative types of solution (Fig. S2): If one transition is rate limiting, another is less likely to be. Strong positive correlations between  $\alpha_i$  and  $\beta_i$  indicate a powerstroke mechanism: Charge movement driven by  $V_m$  and rotation occur together in a single step. This was previously observed to be necessary to model the characteristic concave-down torque–speed curve of fully energized wild-type  $H^+$  motors. Negative correlations between  $\alpha_i$  and  $\alpha_j$ ,  $\beta_i$  and  $\beta_j$ ,  $\Delta G_i^0$  and  $\Delta G_j^0$ ,  $j \neq i$ , are a consequence of the constraints  $\sum(\alpha_i) = \sum(\beta_i) = 1$  and  $\sum(\Delta G_i^0) = 0$ . Negative correlations between  $\alpha_i$  and  $\beta_j$  follow from positive correlations between  $\alpha_i$  and  $\beta_i$  and negative correlations between  $\alpha_i$  and  $\alpha_j$  and  $\beta_i$  and  $\beta_j$ . A powerstroke mechanism is further supported by negative correlations between  $\alpha_i$ ,  $\beta_i$ , and  $k_i$ : The powerstroke must be one of the slower, rate-limiting transitions. Correlations between  $\mu_i$  and  $\alpha_i$  (–ve),  $\mu_i$  and  $\beta_i$  (–ve), and  $\mu_i$  and  $k_i$  (+ve) indicate that the powerstroke, associated with high  $\alpha$ ,  $\beta$  and low  $k$ , is likely to have a low value of  $\mu$ : External resisting torque speeds up the reverse powerstroke rather than slowing the forward powerstroke. This allows the motor to run at high speeds even at high torque, maximizing mechanical power output. Microscopically, it predicts that the angle of the transition state is close to that of the previous state (1), which is another signature of a “powerstroke”: The driving electrochemical transition occurs without large-scale movement of the motor as a whole, allowing forced rather than slow diffusive motion of the motor.

1. Kolomeisky AB, Fisher ME (2007) Molecular motors: A theorist’s perspective. *Annu Rev Phys Chem* 58:675–695.



$V_m = -85$  mV. Powerstrokes in step 2, ion transit, are always rate limiting. Powerstrokes in step 1 are rate limiting at low  $[\text{Na}^+]$ . (C–E) Distributions of states (Upper) and transitions (Lower) for  $[\text{Na}^+] = 1$  mM,  $V_m = -140$  mV, torque = 50 pN nm, as in Fig. 5C, for each of the subtypes of solutions identified in Fig. S2. (C) “Type 1” solutions ( $k_1$  and  $k_2 < 10^{4.2} \text{ s}^{-1}$ , 65.5% of the total), where  $k_1$  and  $k_2$  are both slow and ion transition is the rate-limiting step except at 1 mM  $[\text{Na}^+]$  (Fig. S2A, Lower Left Inset). (D) “Type 2” solutions ( $k_2 > 10^{4.2} \text{ s}^{-1}$ , 30.4% of the total), where  $k_1$  remains slow but  $k_3$  replaces  $k_2$  as the limiting transition rate at  $[\text{Na}^+] > 1$  mM (Fig. S2A, Upper Left Inset). Note that transition 3, ion release into the cytoplasm, is not a powerstroke in these solutions, despite being rate limiting. (E) “Type 3” solutions ( $k_1 > 10^{4.2} \text{ s}^{-1}$ , 4.1% of the total), for which all of  $k_{1,3,4}$  are fast and  $k_2$  is always rate limiting (Fig. S2A, Lower Right Inset). Transition 2, ion transit, is the rate-limiting powerstroke in these solutions.

**Table S1. Sodium-motive force**

| pH  | $[\text{Na}^+]_{\text{ex}}$ |             |             |             |             |                                |
|-----|-----------------------------|-------------|-------------|-------------|-------------|--------------------------------|
|     | 85 mM                       | 30 mM       | 10 mM       | 5 mM        | 1 mM        |                                |
| 7   | <i>-140</i>                 | <i>-136</i> | <i>-141</i> | <i>-141</i> | <i>-143</i> | $V_m$ , mV                     |
|     | <i>13.4</i>                 | <i>10.8</i> | <i>9.9</i>  | <i>8.7</i>  | <i>5.5</i>  | $[\text{Na}]_{\text{in}}$ , mM |
|     | <b>-48</b>                  | <b>-26</b>  | <b>0</b>    | <b>14</b>   | <b>44</b>   | $\Delta\mu/q$ , mV             |
|     | <b>-188</b>                 | <b>-162</b> | <b>-141</b> | <b>-127</b> | <b>-99</b>  | SMF, mV                        |
| 6.5 | <i>-126</i>                 | <i>-125</i> | <i>-126</i> | <i>-123</i> | <i>-123</i> | $V_m$ , mV                     |
|     | <i>9.9</i>                  | <i>9.2</i>  | <i>9.1</i>  | <i>6.9</i>  | <i>4.6</i>  | $[\text{Na}]_{\text{in}}$ , mM |
|     | <b>-56</b>                  | <b>-30</b>  | <b>-2</b>   | <b>9</b>    | <b>40</b>   | $\Delta\mu/q$ , mV             |
|     | <b>-182</b>                 | <b>-155</b> | <b>-128</b> | <b>-114</b> | <b>-83</b>  | SMF, mV                        |
| 6   | <i>-107</i>                 | <i>-108</i> | <i>-108</i> | <i>-106</i> | <i>-108</i> | $V_m$ , mV                     |
|     | <i>9.6</i>                  | <i>8.1</i>  | <i>7.0</i>  | <i>5.1</i>  | <i>3.9</i>  | $[\text{Na}]_{\text{in}}$ , mM |
|     | <b>-56</b>                  | <b>-34</b>  | <b>-9</b>   | <b>1</b>    | <b>35</b>   | $\Delta\mu/q$ , mV             |
|     | <b>-163</b>                 | <b>-142</b> | <b>-117</b> | <b>-105</b> | <b>-73</b>  | SMF, mV                        |
| 5.5 | <i>-96</i>                  | <i>-92</i>  | <i>-94</i>  | <i>-97</i>  | <i>-93</i>  | $V_m$ , mV                     |
|     | <i>8.4</i>                  | <i>8.4</i>  | <i>7.2</i>  | <i>5.3</i>  | <i>3.7</i>  | $[\text{Na}]_{\text{in}}$ , mM |
|     | <b>-60</b>                  | <b>-33</b>  | <b>-9</b>   | <b>2</b>    | <b>34</b>   | $\Delta\mu/q$ , mV             |
|     | <b>-156</b>                 | <b>-125</b> | <b>-103</b> | <b>-95</b>  | <b>-59</b>  | SMF, mV                        |
| 5   | <i>-84</i>                  | <i>-83</i>  | <i>-87</i>  | <i>-86</i>  | <i>-86</i>  | $V_m$ , mV                     |
|     | <i>8.8</i>                  | <i>8.5</i>  | <i>6.1</i>  | <i>4.6</i>  | <i>3.4</i>  | $[\text{Na}]_{\text{in}}$ , mM |
|     | <b>-59</b>                  | <b>-33</b>  | <b>-13</b>  | <b>-2</b>   | <b>32</b>   | $\Delta\mu/q$ , mV             |
|     | <b>-143</b>                 | <b>-116</b> | <b>-100</b> | <b>-88</b>  | <b>-54</b>  | SMF, mV                        |

Shown are the individual components ( $V_m$  and  $\Delta\mu/q$ ) and the total SMF at the values of pH and external sodium concentration under which we measured torque–speed curves (Fig. 3). Data are taken from refs. 1 and 2:  $V_m$  and  $[\text{Na}]_{\text{in}}$  (numbers in italics) are averages of measurements on 50 single cells, which are used to calculate the corresponding values of  $\Delta\mu/q$  and SMF (boldface). SDs of  $V_m$  and  $\Delta\mu/q$  measurements are typically 13 mV and 5 mV, respectively.

- Lo CJ, Leake MC, Berry RM (2006) Fluorescence measurement of intracellular sodium concentration in single *Escherichia coli* cells. *Biophys J* 90(1):357–365.
- Lo CJ, Leake MC, Pilizota T, Berry RM (2007) Nonequivalence of membrane voltage and ion-gradient as driving forces for the bacterial flagellar motor at low load. *Biophys J* 93(1): 294–302.

#### Dataset S1. Excel file of 830 parameter sets found

[Dataset S1](#)
